# Supplementary material for: Paramagnetic Metal Accumulation in the Deep Gray Matter Nuclei Is Associated With Neurodegeneration in Wilson’s Disease
Source: PubMed Central journal article supplement (PMC7525019; doi:10.3389/fnins.2020.573633), 2020-09-16
Supplement: Data_Sheet_1.pdf [file Data_Sheet_1.pdf]

## Supplementary Materials

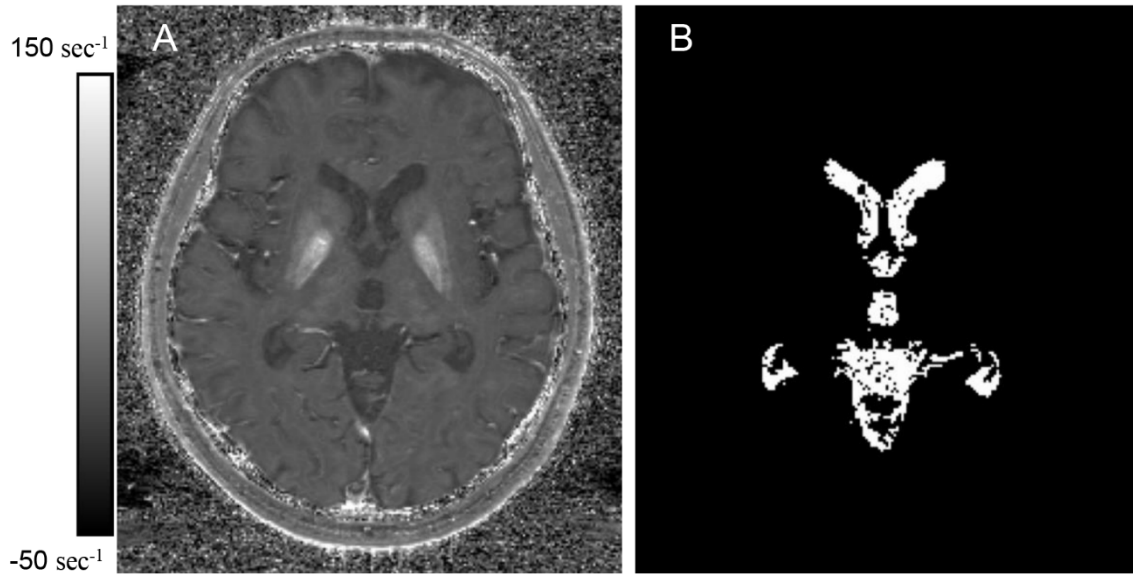

**Figure 1** Example images showing R2\* map and CSF mask (WD patient, 36 years old, male). R2\* map (**A**) was used to automatically determine the ventricular CSF mask  $M_{\text{CSF}}$  (**B**) using MEDI+0 algorithm.

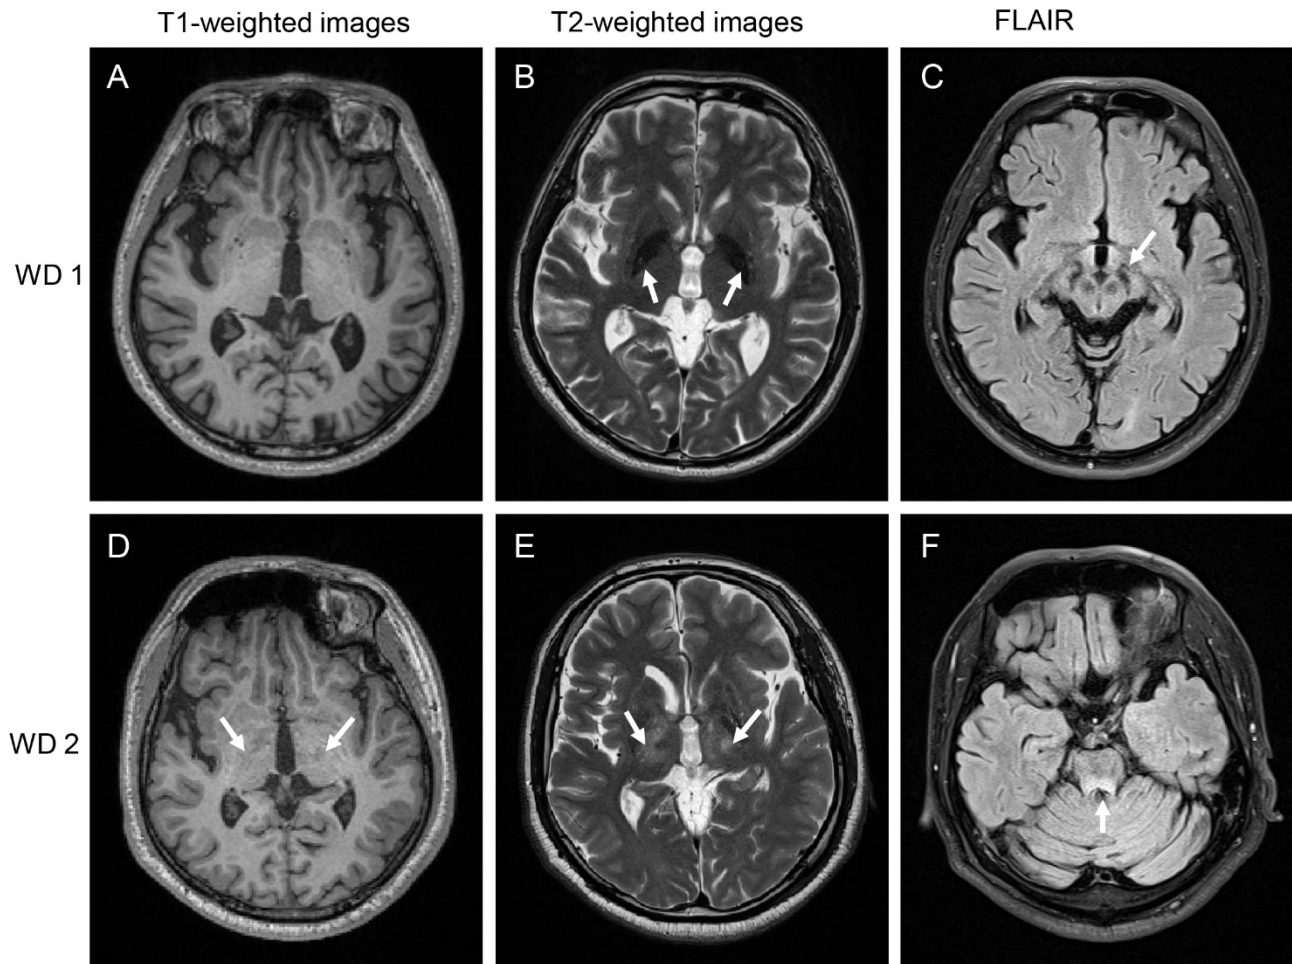

**Figure 2** Conventional MRI abnormalities in neurological WD patients (WD 1: 36 years old, male; WD 2: 33 years old, male). The abnormalities were marked with white arrows. (A) normal T1-weighted images. (B) T2 hypointensities in the globus pallidus. (C) the sign of “face of giant panda” in the midbrain in FLAIR images. (D) T1 hypointensities in the lenticular nucleus and thalamus. (E) T2-hyperintensities in the lenticular nucleus and thalamus. (F) hyperintensities in the tegmentum of pons in FLAIR images. FLAIR, fluid-attenuated inversion recovery; WD, Wilson’s disease.

**Table 1** The susceptibility values and volumes of DGM in all subjects

|     | Susceptibility values (ppb) |                |                  | Volumes (cm <sup>3</sup> ) |                |                  |
|-----|-----------------------------|----------------|------------------|----------------------------|----------------|------------------|
|     | WD (N = 17)                 | HC (N = 20)    | <i>P</i> -value* | WD (N = 17)                | HC (N = 20)    | <i>P</i> -value* |
| CN  | 105.79 (42.08)              | 36.82 (10.4)   | < 0.001          | 2.321 (0.793)              | 4.2 (0.618)    | < 0.001          |
| GP  | 261.52 (78.84)              | 111.26 (27.58) | < 0.001          | 1.885 (0.499)              | 3.156 (0.326)  | < 0.001          |
| Put | 121.39 (48.01)              | 22.16 (12.89)  | < 0.001          | 2.922 (0.845)              | 6.438 (1.343)  | < 0.001          |
| Th  | 13.6 (10.14)                | − 7.83 (6.09)  | < 0.001          | 7.78 (1.684)               | 10.151 (1.217) | < 0.001          |
| SN  | 213.96 (66.92)              | 96.00 (30.42)  | < 0.001          | 0.547 (0.085)              | 0.898 (0.1)    | < 0.001          |
| RN  | 139.8 (45.65)               | 75.98 (33.01)  | < 0.001          | 0.346 (0.129)              | 0.409 (0.07)   | 0.114            |
| DN  | 95.23 (54.95)               | 62.39 (27.1)   | 0.031            | 1.206 (0.272)              | 1.254 (0.337)  | 0.614            |

Standard deviations are in parentheses.

\* *P*-values were corrected by controlling the false discovery rate at a level of 0.05.

CN, head of the caudate nucleus; DGM, deep gray matter; DN, dentate nucleus; GP, globus pallidus; N, number; Put, putamen; RN, red nucleus; SN, substantia nigra; Th, thalamus; WD, Wilson's disease.

**Table 2** Stepwise multiple regression models using susceptibility values of DGM to predict UWDRS neurological subscores

| Model   | R <sup>2</sup> | Adjusted R <sup>2</sup> | Model P-value | Predictor | Unstandardized Coefficient | Standardized Coefficient | P-value |
|---------|----------------|-------------------------|---------------|-----------|----------------------------|--------------------------|---------|
| Model 1 | 0.415          | 0.376                   | 0.005         | Put       | 0.163 (0.05)               | 0.644                    | 0.005   |
| Model 2 | 0.678          | 0.632                   | < 0.001       | Put       | 0.146 (0.039)              | 0.577                    | 0.002   |
|         |                |                         |               | DN        | 0.114 (0.034)              | 0.517                    | 0.004   |
| Model 3 | 0.774          | 0.722                   | < 0.001       | Put       | 0.063 (0.049)              | 0.248                    | 0.22    |
|         |                |                         |               | DN        | 0.123 (0.03)               | 0.555                    | 0.001   |
|         |                |                         |               | CN        | 0.13 (0.055)               | 0.45                     | 0.035   |
| Model 4 | 0.745          | 0.709                   | < 0.001       | CN        | 0.181 (0.039)              | 0.628                    | < 0.001 |
|         |                |                         |               | DN        | 0.129 (0.03)               | 0.585                    | 0.001   |

Standard errors are in parentheses.

$P < 0.05$  was considered significant. CN, head of the caudate nucleus; DGM, deep gray matter; DN, dentate nucleus; Put, putamen
